# Supplementary material for: Molecular Analysis of Canine Filaria and Its Wolbachia Endosymbionts in Domestic Dogs Collected from Two Animal University Hospitals in Bangkok Metropolitan Region, Thailand
Source: MDPI journal article supplement (doi:10.3390/pathogens8030114), 2019-07-29
Supplement: s1 [file s1]

**Supplementary Materials:**

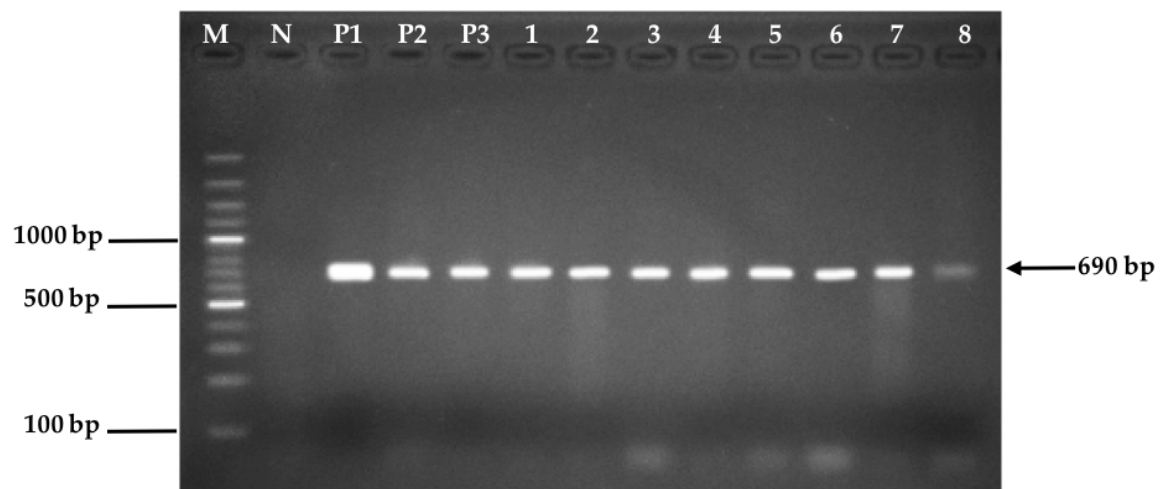

**Figure S1:** PCR amplification of the partial *COI* gene for filarial nematode. Lane M: Molecular mass marker (100 base pairs [bp]). Lane P1: *D. immitis* positive control. Lane P2: *B. pahangi* positive control. Lane P3: *B. malayi* positive control. Lane N: Negative control. Lanes 1–8: Positive samples.

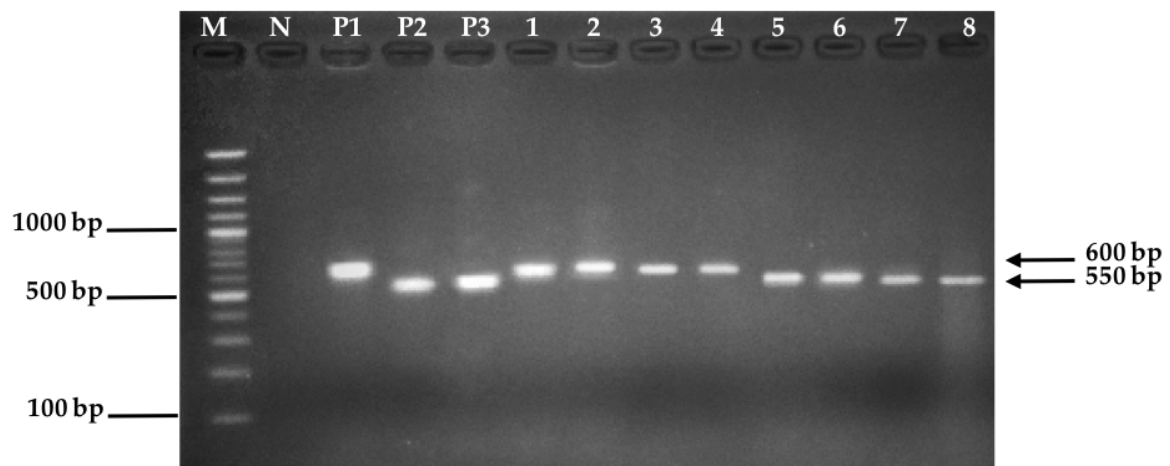

**Figure S2:** PCR amplification of the *ITS1* region for the filarial nematode. Lane M: Molecular mass marker (100 base pairs [bp]). Lane P1: *D. immitis* positive control. Lane P2: *B. pahangi* positive control. Lane P3: *B. malayi* positive control. Lane N: Negative control. Lanes 1–8: Positive samples.



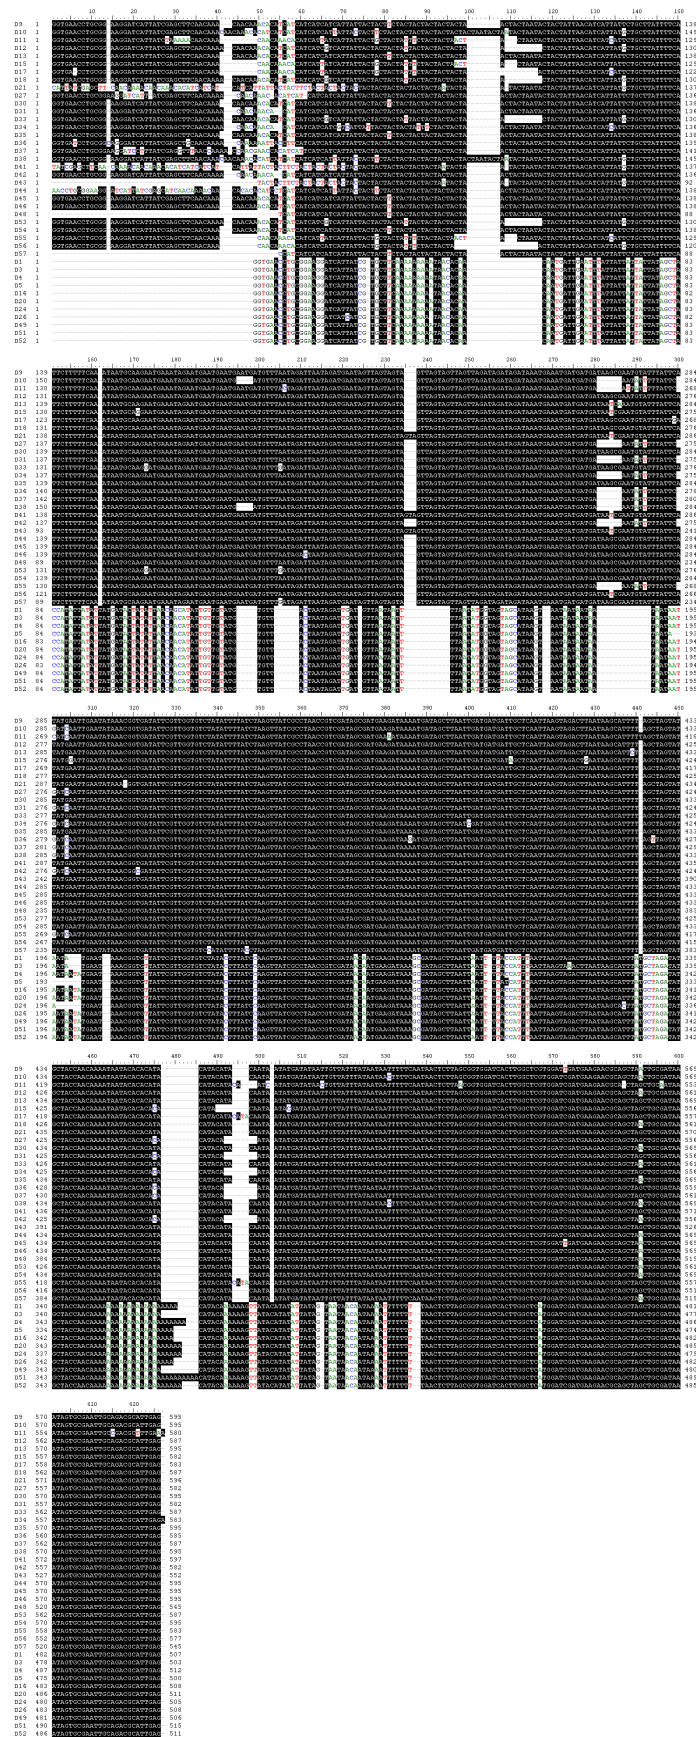

Figure S4: Sequence alignment of the filaria nematode based on the *ITS1* region

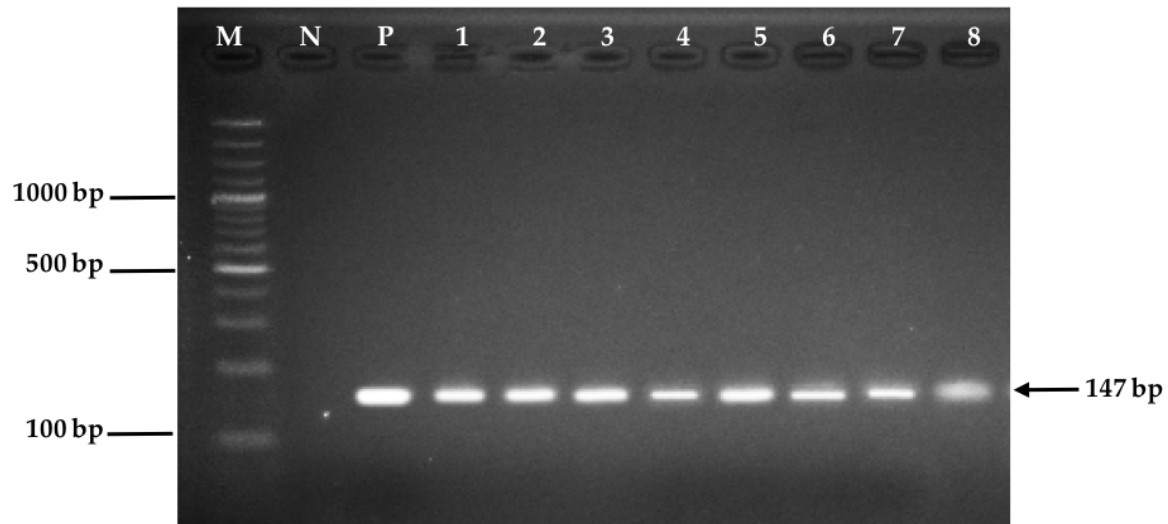

**Figure S5:** PCR amplicons of the *FtsZ* specific to *Wolbachia*. Lane M: molecular mass marker (100 base pairs [bp]). Lane P1: *Wolbachia* positive control. Lane N: Negative control. Lanes 1–8: Positive samples.

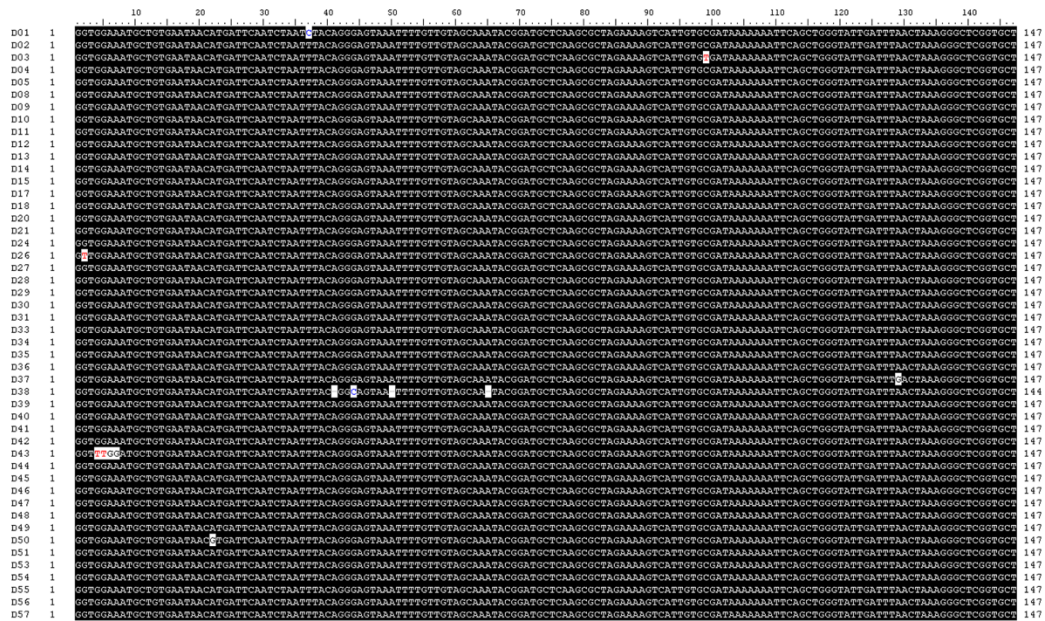

**Figure S6:** Sequence alignment of *Wolbachia* bacteria based on the *FtsZ* gene.

**Table S1:** Raw data of samples.

| CODE | COI gene          | ITS1 region       | FtsZ gene        |
|------|-------------------|-------------------|------------------|
| D01  | <i>B. pahangi</i> | <i>B. pahangi</i> | <i>Wolbachia</i> |
| D02  | <i>D. immitis</i> | -                 | <i>Wolbachia</i> |
| D03  | <i>B. pahangi</i> | <i>B. pahangi</i> | <i>Wolbachia</i> |
| D04  | <i>B. pahangi</i> | <i>B. pahangi</i> | <i>Wolbachia</i> |
| D05  | <i>B. pahangi</i> | <i>B. pahangi</i> | <i>Wolbachia</i> |
| D06  | <i>B. malayi</i>  | -                 | <i>Wolbachia</i> |
| D07  | -                 | -                 | -                |
| D08  | -                 | -                 | -                |
| D09  | <i>D. immitis</i> | <i>D. immitis</i> | <i>Wolbachia</i> |
| D10  | <i>D. immitis</i> | <i>D. immitis</i> | <i>Wolbachia</i> |
| D11  | <i>D. immitis</i> | <i>D. immitis</i> | <i>Wolbachia</i> |
| D12  | <i>D. immitis</i> | <i>D. immitis</i> | <i>Wolbachia</i> |
| D13  | <i>D. immitis</i> | <i>D. immitis</i> | <i>Wolbachia</i> |
| D14  | <i>B. malayi</i>  | -                 | <i>Wolbachia</i> |
| D15  | <i>D. immitis</i> | <i>D. immitis</i> | <i>Wolbachia</i> |
| D16  | <i>B. pahangi</i> | <i>B. pahangi</i> | -                |
| D17  | <i>D. immitis</i> | <i>D. immitis</i> | <i>Wolbachia</i> |
| D18  | <i>D. immitis</i> | <i>D. immitis</i> | <i>Wolbachia</i> |
| D19  | -                 | -                 | -                |
| D20  | <i>B. pahangi</i> | <i>B. pahangi</i> | <i>Wolbachia</i> |
| D21  | <i>D. immitis</i> | <i>D. immitis</i> | <i>Wolbachia</i> |
| D22  | -                 | -                 | -                |
| D23  | -                 | -                 | -                |
| D24  | <i>B. pahangi</i> | <i>B. pahangi</i> | <i>Wolbachia</i> |
| D25  | -                 | -                 | -                |
| D26  | <i>B. pahangi</i> | <i>B. pahangi</i> | <i>Wolbachia</i> |
| D27  | <i>D. immitis</i> | <i>D. immitis</i> | <i>Wolbachia</i> |
| D28  | <i>B. pahangi</i> | -                 | <i>Wolbachia</i> |



|     |                   |                   |                  |
|-----|-------------------|-------------------|------------------|
| D29 | <i>B. malayi</i>  | <i>B. pahangi</i> | <i>Wolbachia</i> |
| D30 | <i>D. immitis</i> | <i>D. immitis</i> | <i>Wolbachia</i> |
| D31 | <i>D. immitis</i> | <i>D. immitis</i> | <i>Wolbachia</i> |
| D32 | -                 | -                 | -                |
| D33 | <i>D. immitis</i> | <i>D. immitis</i> | <i>Wolbachia</i> |
| D34 | <i>D. immitis</i> | <i>D. immitis</i> | <i>Wolbachia</i> |
| D35 | <i>D. immitis</i> | <i>D. immitis</i> | <i>Wolbachia</i> |
| D36 | <i>D. immitis</i> | <i>D. immitis</i> | <i>Wolbachia</i> |
| D37 | <i>D. immitis</i> | <i>D. immitis</i> | <i>Wolbachia</i> |
| D38 | <i>D. immitis</i> | <i>D. immitis</i> | <i>Wolbachia</i> |
| D39 | <i>D. immitis</i> | -                 | <i>Wolbachia</i> |
| D40 | <i>B. pahangi</i> | -                 | <i>Wolbachia</i> |
| D41 | <i>D. immitis</i> | <i>D. immitis</i> | <i>Wolbachia</i> |
| D42 | <i>D. immitis</i> | <i>D. immitis</i> | <i>Wolbachia</i> |
| D43 | <i>D. immitis</i> | <i>D. immitis</i> | <i>Wolbachia</i> |
| D44 | <i>D. immitis</i> | <i>D. immitis</i> | <i>Wolbachia</i> |
| D45 | <i>D. immitis</i> | <i>D. immitis</i> | <i>Wolbachia</i> |
| D46 | <i>D. immitis</i> | <i>D. immitis</i> | <i>Wolbachia</i> |
| D47 | <i>D. immitis</i> | -                 | <i>Wolbachia</i> |
| D48 | <i>D. immitis</i> | <i>D. immitis</i> | <i>Wolbachia</i> |
| D49 | <i>B. pahangi</i> | <i>B. pahangi</i> | <i>Wolbachia</i> |
| D50 | <i>B. malayi</i>  | -                 | <i>Wolbachia</i> |
| D51 | <i>B. pahangi</i> | <i>B. pahangi</i> | <i>Wolbachia</i> |
| D52 | <i>B. pahangi</i> | <i>B. pahangi</i> | -                |
| D53 | <i>D. immitis</i> | <i>D. immitis</i> | <i>Wolbachia</i> |
| D54 | <i>D. immitis</i> | <i>D. immitis</i> | <i>Wolbachia</i> |
| D55 | <i>D. immitis</i> | <i>D. immitis</i> | <i>Wolbachia</i> |
| D56 | <i>D. immitis</i> | <i>D. immitis</i> | <i>Wolbachia</i> |
| D57 | <i>D. immitis</i> | <i>D. immitis</i> | <i>Wolbachia</i> |
